# Supplementary material
Source: Frontiers journal article supplement (https://www.frontiersin.org/articles/519775)
Supplement: Table_1.XLSX [file Table_1.XLSX]

## Sheet: Table S1
	Species	Region	Maximum depth (m)	Turbidity-tolerant	Typical growth form
	Acanthastrea bowerbanki	IP	20	no	massive
	Acanthastrea brevis	IP	20	no	massive
	Acanthastrea echinata	IP	50	yes	massive
	Acanthastrea faviaformis	IP	12	no	massive
	Acanthastrea hemprichii	IP	20	yes	massive
	Acanthastrea hillae	IP	20	no	massive
	Acanthastrea ishigakiensis	IP	15	no	massive
	Acanthastrea lordhowensis	IP	30	no	massive
	Acanthastrea regularis	IP	20	no	massive
	Acanthastrea rotundoflora	IP	30	no	other
	Acanthastrea subechinata	IP	35	no	massive
	Acanthophyllia deshayesiana	IP	70	no	other
	Acropora abrolhosensis	IP	40	no	branching
	Acropora abrotanoides	IP	26	no	branching
	Acropora aculeus	IP	60	no	branching
	Acropora acuminata	IP	25	yes	branching
	Acropora akajimensis	IP	20	no	branching
	Acropora anthocercis	IP	25	no	branching
	Acropora appressa	IP	15	no	branching
	Acropora arabensis	IP	12	no	branching
	Acropora arafura	IP	-	-	branching
	Acropora aspera	IP	15	no	branching
	Acropora austera	IP	40	no	branching
	Acropora awi	IP	20	yes	branching
	Acropora azurea	IP	10	no	branching
	Acropora batunai	IP	45	no	branching
	Acropora bifurcata	IP	25	no	branching
	Acropora branchi	IP	-	no	branching
	Acropora bushyensis	IP	5	no	branching
	Acropora cardenae	IP	60	no	branching
	Acropora carduus	IP	50	no	branching
	Acropora caroliniana	IP	40	no	branching
	Acropora cerealis	IP	40	no	branching
	Acropora cervicornis	C	60	no	branching
	Acropora chesterfieldensis	IP	40	no	branching
	Acropora clathrata	IP	40	no	branching
	Acropora convexa	IP	20	yes	branching
	Acropora cophodactyla	IP	12	no	branching
	Acropora copiosa	IP	-	no	branching
	Acropora cytherea	IP	67	no	branching
	Acropora dendrum	IP	20	no	branching
	Acropora derawanensis	IP	30	yes	branching
	Acropora desalwii	IP	35	no	branching
	Acropora digitifera	IP	22	no	branching
	Acropora divaricata	IP	25	no	branching
	Acropora donei	IP	45	no	branching
	Acropora downingi	IP	10	no	branching
	Acropora echinata	IP	60	no	branching
	Acropora efflorescensis	IP	40	no	branching
	Acropora elegans	IP	60	no	branching
	Acropora elegantula	IP	20	no	branching
	Acropora elseyi	IP	35	no	branching
	Acropora eurystoma	IP	26	no	branching
	Acropora exquisita	IP	20	no	branching
	Acropora fastigata	IP	20	no	branching
	Acropora fenneri	IP	-	no	branching
	Acropora filiformis	IP	20	no	branching
	Acropora florida	IP	40	no	branching
	Acropora forskali	IP	25	no	branching
	Acropora gemmifera	IP	18	no	branching
	Acropora glauca	IP	20	yes	branching
	Acropora globiceps	IP	20	no	branching
	Acropora grandis	IP	25	no	branching
	Acropora granulosa	IP	65	no	branching
	Acropora haimei	IP	15	no	branching
	Acropora halmaherae	IP	25	yes	branching
	Acropora hemprichii	IP	15	no	branching
	Acropora hoeksemai	IP	22	no	branching
	Acropora horrida	IP	40	yes	branching
	Acropora humilis	IP	20	no	branching
	Acropora hyacinthus	IP	26	no	branching
	Acropora indonesia	IP	26	no	branching
	Acropora insignis	IP	30	no	branching
	Acropora intermedia	IP	25	no	branching
	Acropora jacquelineae	IP	36	no	branching
	Acropora japonica	IP	8	no	branching
	Acropora khayranensis	IP	-	no	branching
	Acropora kimbeensis	IP	40	no	branching
	Acropora kirstyae	IP	30	no	branching
	Acropora kosurini	IP	20	no	branching
	Acropora lamarcki	IP	15	no	branching
	Acropora latistella	IP	40	yes	branching
	Acropora lianae	IP	20	no	branching
	Acropora listeri	IP	17.5	no	branching
	Acropora loisetteae	IP	30	no	branching
	Acropora lokani	IP	40	no	branching
	Acropora longicyathus	IP	25	no	branching
	Acropora loripes	IP	40	no	branching
	Acropora loveli	IP	30	no	branching
	Acropora lutkeni	IP	26	no	branching
	Acropora maryae	IP	15	no	branching
	Acropora massawensis	IP	15	no	branching
	Acropora meridiana	IP	15	no	branching
	Acropora microclados	IP	42	no	branching
	Acropora microphthalma	IP	40	yes	branching
	Acropora minuta	IP	8	no	branching
	Acropora mirabilis	IP	63	no	branching
	Acropora mllepora	IP	30	no	branching
	Acropora monticulosa	IP	14	no	branching
	Acropora mossambica	IP	26	-	branching
	Acropora multiacuta	IP	30	no	branching
	Acropora muricata	IP	30	no	branching
	Acropora nana	IP	15	no	branching
	Acropora nasuta	IP	30	no	branching
	Acropora natalensis	IP	30	no	branching
	Acropora navini	IP	20	no	branching
	Acropora ocellata	IP	12	no	branching
	Acropora orbicularis	IP	12	no	branching
	Acropora palmata	C	40	no	branching
	Acropora palmerae	IP	23	no	branching
	Acropora paniculata	IP	42	no	branching
	Acropora papillare	IP	23	no	branching
	Acropora paragemmifera	IP	-	no	branching
	Acropora parahemprichii	IP	20	no	branching
	Acropora parapharaonis	IP	20	no	branching
	Acropora parilis	IP	-	yes	branching
	Acropora pectinatus	IP	20	no	branching
	Acropora pharaonis	IP	25	no	branching
	Acropora pichoni	IP	70	no	branching
	Acropora pinguis	IP	20	no	branching
	Acropora plana	IP	30	no	branching
	Acropora plantaginea	IP	10	no	branching
	Acropora plumosa	IP	30	no	branching
	Acropora polystoma	IP	17.5	no	branching
	Acropora prolifera	C	-	no	branching
	Acropora proximalis	IP	15	no	branching
	Acropora pruinosa	IP	20	yes	branching
	Acropora pulchra	IP	20	no	branching
	Acropora rambleri	IP	40	no	branching
	Acropora retusa	IP	28.5	no	branching
	Acropora robusta	IP	17.5	no	branching
	Acropora rongelapensis	IP	40	yes	branching
	Acropora rosaria	IP	-	no	branching
	Acropora roseni	IP	12	no	branching
	Acropora rudis	IP	30	no	branching
	Acropora rufus	IP	10	no	branching
	Acropora russelli	IP	30	no	branching
	Acropora samoensis	IP	15	no	branching
	Acropora sarmentosa	IP	26	no	branching
	Acropora scherzeriana	IP	15	no	branching
	Acropora schmitti	IP	15	no	branching
	Acropora secale	IP	30	no	branching
	Acropora sekiseiensis	IP	15	no	branching
	Acropora selago	IP	40	yes	branching
	Acropora seriata	IP	12	no	branching
	Acropora simplex	IP	60	no	branching
	Acropora sirikitiae	IP	-	-	branching
	Acropora solitaryensis	IP	40	no	branching
	Acropora spathulata	IP	11	no	branching
	Acropora speciosa	IP	65	no	branching
	Acropora spicifera	IP	12	no	branching
	Acropora squarrosa	IP	60	no	branching
	Acropora stoddarti	IP	30	no	branching
	Acropora striata	IP	34.1	no	branching
	Acropora subglabra	IP	40	no	branching
	Acropora subulata	IP	30	no	branching
	Acropora suharsonoi	IP	25	no	branching
	Acropora sukarnoi	IP	30	no	branching
	Acropora tanegashimensis	IP	15	no	branching
	Acropora tenella	IP	70	no	branching
	Acropora tenuis	IP	26	no	branching
	Acropora teres	IP	20	no	branching
	Acropora tizardi	IP	25	no	branching
	Acropora torihalimeda	IP	63	no	branching
	Acropora torresiana	IP	5	no	branching
	Acropora tortuosa	IP	35	no	branching
	Acropora tumida	IP	40	yes	branching
	Acropora turaki	IP	20	yes	branching
	Acropora tutuilensis	IP	20	no	branching
	Acropora valenciennesi	IP	45	no	branching
	Acropora valida	IP	45	no	branching
	Acropora variabilis	IP	34	no	branching
	Acropora variolosa	IP	30	no	branching
	Acropora vaughani	IP	40	yes	branching
	Acropora vermiculata	IP	20	no	branching
	Acropora verweyi	IP	29	no	branching
	Acropora walindii	IP	40	no	branching
	Acropora wallaceae	IP	-	-	branching
	Acropora willisae	IP	40	no	branching
	Acropora yongei	IP	21	yes	branching
	Agaricia agaricites	C, SA	75	no	plate
	Agaricia fragilis	C, SA	102	yes	plate
	Agaricia grahamae	C	115	no	plate
	Agaricia humilis	C	20	no	other
	Agaricia lamarcki	C	76	no	plate
	Agaricia tenuifolia	C	18	no	plate
	Agaricia undata	C	80	no	plate
	Alveopora allingi	IP	60	no	massive
	Alveopora catalai	IP	30	yes	branching
	Alveopora daedalea	IP	30	no	massive
	Alveopora excelsa	IP	30	no	massive
	Alveopora fenestrata	IP	30	no	massive
	Alveopora gigas	IP	30	yes	massive
	Alveopora japonica	IP	-	no	massive
	Alveopora marionensis	IP	30	no	massive
	Alveopora minuta	IP	20	no	massive
	Alveopora ocellata	IP	60	no	other
	Alveopora spongiosa	IP	50	no	massive
	Alveopora tizardi	IP	50	no	massive
	Alveopora verrilliana	IP	70	no	massive
	Alveopora viridis	IP	50	no	massive
	Anacropora forbesi	IP	25	yes	branching
	Anacropora matthaii	IP	20	no	branching
	Anacropora pillai	IP	25	yes	branching
	Anacropora puertogalerae	IP	20	yes	branching
	Anacropora reticulata	IP	15	no	branching
	Anacropora spinosa	IP	15	no	branching
	Anacropora spumosa	IP	15	no	branching
	Anomastraeae irregularis	IP	20	yes	massive
	Astrangia poculata	C	-	no	massive
	Astrea annuligera	IP	30	no	other
	Astrea curta	IP	45	no	massive
	Astrea rotulosa	IP	20	no	massive
	Astreopora acroporina	IP	-	-	branching
	Astreopora cenderawasih	IP	-	-	branching
	Astreopora cucullata	IP	15	no	massive
	Astreopora expansa	IP	15	no	plate
	Astreopora gracilis	IP	15	yes	massive
	Astreopora incrustans	IP	40	no	other
	Astreopora listeri	IP	30	yes	massive
	Astreopora macrostoma	IP	15	no	other
	Astreopora montiporina	IP	-	-	plate
	Astreopora moretonensis	IP	15	no	plate
	Astreopora myriophthalma	IP	50	no	massive
	Astreopora ocellata	IP	30	no	massive
	Astreopora randalli	IP	15	no	plate
	Astreopora scabra	IP	15	no	massive
	Astreopora suggesta	IP	15	no	massive
	Australogyra zelli	IP	15	yes	branching
	Australomussa rowleyensis	IP	40	no	massive
	Balanophyllia europaea	IP	-	no	other
	Bernardpora stutchburyi	IP	30	no	other
	Blastomussa loyae	IP	-	-	massive
	Blastomussa merleti	IP	50	yes	other
	Blastomussa vivida	IP	-	-	other
	Blastomussa wellsi	IP	40	yes	other
	Boninastrea boninensis	IP	-	no	massive
	Calathiscus tantillus	IP	22	no	other
	Cantahrellus doederleini	IP	30	no	other
	Cantahrellus jebbi	IP	25	no	other
	Cantahrellus noumeae	IP	30	no	other
	Catalaphyllia jardinei	IP	40	yes	other
	Caulastrea connata	IP	10	no	other
	Caulastrea curvata	IP	20	no	branching
	Caulastrea echinulata	IP	18	yes	other
	Caulastrea furcata	IP	30	no	other
	Caulastrea tumida	IP	40	yes	other
	Cladocora arbuscula	C	25	yes	branching
	Coeloseris mayeri	IP	5	no	massive
	Colpophyllia natans	C	55	no	massive
	Coscinaraea columna	IP	30	no	massive
	Coscinaraea crassa	IP	30	no	massive
	Coscinaraea exesa	IP	35	no	massive
	Coscinaraea hahazimensis	IP	-	no	massive
	Coscinaraea marshae	IP	-	no	plate
	Coscinaraea mcneilli	IP	-	yes	plate
	Coscinaraea monile	IP	70	no	massive
	Coscinaraea wellsi	IP	58	no	plate
	Craterastrea levis	IP	70	no	plate
	Ctenactis albitentaculata	IP	20	no	other
	Ctenactis crassa	IP	67	no	other
	Ctenactis echinata	IP	20	no	other
	Ctenella chagius	IP	45	no	massive
	Cycloseris boschmai	IP	-	-	other
	Cycloseris colini	IP	40	no	other
	Cycloseris costulata	IP	30	no	other
	Cycloseris curvata	IP	73	no	other
	Cycloseris cyclolites	IP	40	no	other
	Cycloseris hexagonalis	IP	25	no	other
	Cycloseris sinensis	IP	40	no	other
	Cycloseris somervillei	IP	35	no	other
	Cycloseris tenuis	IP	27	no	other
	Cycloseris vaughani	IP	36	no	other
	Cynarina lacrymalis	IP	70	no	other
	Cyphastrea agassizi	IP	20	no	massive
	Cyphastrea chalcidicum	IP	50	no	massive
	Cyphastrea decadia	IP	40	no	branching
	Cyphastrea hexasepta	IP	25	no	massive
	Cyphastrea japonica	IP	20	no	massive
	Cyphastrea kausti	IP	-	-	massive
	Cyphastrea microphthalma	IP	50	no	massive
	Cyphastrea ocellina	IP	20	no	massive
	Cyphastrea serailia	IP	50	no	massive
	Dendrogyra cylindrus	C	25	no	massive
	Dichocoenia stellaris	C	22	-	massive
	Dichocoenia stokesi	C	72	no	massive
	Diploastrea heliopora	IP	30	no	massive
	Diploria clivosa	C	-	yes	massive
	Diploria labyrinthiformis	C	43	no	massive
	Diploria strigosa	C	55	no	massive
	Duncanopsammia axifuga	IP	30	no	branching
	Echinomorpha nishihirai	IP	40	no	other
	Echinophyllia aspera	IP	90	no	plate
	Echinophyllia costata	IP	10	no	plate
	Echinophyllia echinata	IP	40	no	plate
	Echinophyllia echinoporoides	IP	30	yes	other
	Echinophyllia orpheensis	IP	30	yes	massive
	Echinophyllia patula	IP	40	no	plate
	Echinophyllia pectinata	IP	40	yes	other
	Echinophyllia tarae	IP	-	-	plate
	Echinopora ashmorensis	IP	20	no	branching
	Echinopora forskaliana	IP	20	no	massive
	Echinopora fruticulosa	IP	20	no	branching
	Echinopora gemmacea	IP	50	no	plate
	Echinopora hirsutissima	IP	40	no	massive
	Echinopora horrida	IP	25	no	branching
	Echinopora irregularis	IP	4	no	branching
	Echinopora lamellosa	IP	50	no	plate
	Echinopora mammiformis	IP	15	no	branching
	Echinopora pacificus	IP	15	no	plate
	Echinopora robusta	IP	25	no	massive
	Echinopora taylorae	IP	12	no	plate
	Echinopora tiranensis	IP	15	no	branching
	Enigmopora darveliensis	IP	-	yes	branching
	Erythrastrea flabellata	IP	25	no	other
	Euphyllia ancora	IP	30	no	other
	Euphyllia baliensis	IP	-	-	branching
	Euphyllia cristata	IP	35	no	other
	Euphyllia divisa	IP	35	yes	other
	Euphyllia glabrescens	IP	35	no	other
	Euphyllia paraancora	IP	30	no	other
	Euphyllia paradivisa	IP	72	no	other
	Euphyllia paraglabrescens	IP	15	no	other
	Euphyllia yaeyamaensis	IP	30	no	other
	Eusmilia fastigiata	C	65	no	other
	Favia albidus	IP	10	no	massive
	Favia amicorum	IP	20	no	massive
	Favia danai	IP	20	yes	massive
	Favia favus	IP	50	no	massive
	Favia fragum	C	30	no	massive
	Favia gravida	SA	30	yes	massive
	Favia helianthoides	IP	20	no	massive
	Favia lacuna	IP	15	no	massive
	Favia laddi	IP	10	no	other
	Favia laxa	IP	25	no	massive
	Favia lizardensis	IP	20	no	massive
	Favia maritima	IP	30	no	massive
	Favia marshae	IP	15	no	massive
	Favia matthaii	IP	40	no	massive
	Favia maxima	IP	25	no	massive
	Favia pallida	IP	50	no	massive
	Favia rosaria	IP	20	no	other
	Favia rotumana	IP	30	no	massive
	Favia rotundata	IP	20	no	massive
	Favia speciosa	IP	45	no	massive
	Favia stelligera	IP	40	no	massive
	Favia truncatus	IP	20	no	massive
	Favia veroni	IP	25	no	massive
	Favia vietnamensis	IP	20	no	massive
	Favites abdita	IP	50	yes	massive
	Favites acuticollis	IP	20	no	massive
	Favites bestae	IP	20	no	massive
	Favites chinensis	IP	20	no	massive
	Favites colemani	IP	20	yes	other
	Favites complanata	IP	50	yes	massive
	Favites flexuosa	IP	20	no	massive
	Favites halicora	IP	55	no	massive
	Favites magnistellata	IP	30	no	massive
	Favites micropentagona	IP	20	no	massive
	Favites paraflexuosus	IP	20	no	massive
	Favites pentagona	IP	50	no	massive
	Favites russelli	IP	25	yes	massive
	Favites spinosa	IP	10	no	massive
	Favites stylifera	IP	20	no	massive
	Favites valenciennesi	IP	30	yes	massive
	Favites vasta	IP	20	no	massive
	Fungia concinna	IP	50	no	other
	Fungia corona	IP	55	no	other
	Fungia danai	IP	25	no	other
	Fungia fralinae	IP	27	no	other
	Fungia fungites	IP	50	no	other
	Fungia granulosa	IP	60	no	other
	Fungia gravis	IP	-	-	other
	Fungia moluccensis	IP	30	yes	other
	Fungia paumotensis	IP	40	no	other
	Fungia repanda	IP	40	no	other
	Fungia scabra	IP	24	no	other
	Fungia scutaria	IP	40	no	other
	Fungia seychellensis	IP	25	no	other
	Fungia taiwanensis	IP	35	no	other
	Galaxea acrhelia	IP	15	no	branching
	Galaxea astreata	IP	55	yes	massive
	Galaxea cryptoramosa	IP	15	no	branching
	Galaxea fascicularis	IP	22	no	massive
	Galaxea horrescens	IP	25	no	branching
	Galaxea lawisiana	IP	-	-	massive
	Galaxea longisepta	IP	20	no	other
	Galaxea paucisepta	IP	20	no	other
	Gardineroseris planulata	IP	40	no	massive
	Goniastrea aspera	IP	15	yes	massive
	Goniastrea australensis	IP	40	no	massive
	Goniastrea columella	IP	15	no	massive
	Goniastrea deformis	IP	20	no	massive
	Goniastrea edwardsi	IP	30	no	massive
	Goniastrea favulus	IP	15	no	massive
	Goniastrea minuta	IP	15	no	massive
	Goniastrea palauensis	IP	30	yes	massive
	Goniastrea pectinata	IP	40	no	massive
	Goniastrea peresi	IP	40	no	massive
	Goniastrea ramosa	IP	15	no	branching
	Goniastrea retiformis	IP	20	no	massive
	Goniastrea thecata	IP	15	no	massive
	Goniopora albiconus	IP	30	no	other
	Goniopora burgosi	IP	30	no	massive
	Goniopora cellulosa	IP	20	no	massive
	Goniopora ciliatus	IP	30	no	massive
	Goniopora columna	IP	15	yes	massive
	Goniopora djiboutiensis	IP	58	yes	massive
	Goniopora eclipsensis	IP	20	no	massive
	Goniopora fruticosa	IP	25	no	branching
	Goniopora lobata	IP	30	yes	massive
	Goniopora minor	IP	50	no	massive
	Goniopora norfolkensis	IP	30	no	massive
	Goniopora palmensis	IP	20	no	massive
	Goniopora pandoraensis	IP	20	yes	branching
	Goniopora pearsoni	IP	-	no	massive
	Goniopora pendulus	IP	20	yes	massive
	Goniopora planulata	IP	20	no	massive
	Goniopora polyformis	IP	-	no	branching
	Goniopora savignyi	IP	20	no	massive
	Goniopora somaliensis	IP	60	no	plate
	Goniopora stokesi	IP	30	no	massive
	Goniopora sultani	IP	20	no	massive
	Goniopora tantillus	IP	22	no	other
	Goniopora tenella	IP	30	no	other
	Goniopora tenuidens	IP	40	no	massive
	Gyrosmilia interrupta	IP	30	no	massive
	Halomitra clavator	IP	25	no	plate
	Halomitra meierae	IP	25	no	massive
	Halomitra pileus	IP	25	no	massive
	Heliofungia actiniformis	IP	25	yes	other
	Helioseris cucullata	C	40	no	plate
	Herpolitha limax	IP	40	no	other
	Heterocyathus aequicostatus	IP	100	no	other
	Heteropsammia cochlea	IP	100	yes	other
	Horastrea indica	IP	40	no	massive
	Hydnophora bonsai	IP	25	no	branching
	Hydnophora exesa	IP	55	no	massive
	Hydnophora grandis	IP	25	no	other
	Hydnophora microconos	IP	35	no	massive
	Hydnophora pilosa	IP	30	no	massive
	Hydnophora rigida	IP	40	no	branching
	Indophyllia macassarensis	IP	25	no	other
	Isophyllia rigida	C	20	no	massive
	Isophyllia sinuosa	C	20	no	massive
	Isopora bruegemanni	IP	35	no	branching
	Isopora crateriformis	IP	25	no	other
	Isopora cuneata	IP	20	no	other
	Isopora cylindrica	IP	-	-	branching
	Isopora elizabethensis	IP	20	yes	branching
	Isopora palifera	IP	40	no	branching
	Isopora togianensis	IP	25	no	branching
	Leptastrea aequalis	IP	20	no	other
	Leptastrea bewickensis	IP	20	no	other
	Leptastrea bottae	IP	30	no	other
	Leptastrea inaequalis	IP	20	no	massive
	Leptastrea pruinosa	IP	40	no	other
	Leptastrea purpurea	IP	40	no	massive
	Leptastrea transversa	IP	50	no	other
	Leptoria irregularis	IP	20	no	other
	Leptoria phrygia	IP	30	no	massive
	Leptoseris amitoriensis	IP	30	no	plate
	Leptoseris cailleti	C	150	no	plate
	Leptoseris cucullata	C	90	no	plate
	Leptoseris explanata	IP	70	no	plate
	Leptoseris foliosa	IP	30	no	plate
	Leptoseris gardineri	IP	70	no	plate
	Leptoseris hawaiiensis	IP	165	no	plate
	Leptoseris incrustans	IP	70	no	plate
	Leptoseris kalayaanensis	IP	-	-	plate
	Leptoseris mycetoseroides	IP	80	no	plate
	Leptoseris papyracea	IP	89	no	plate
	Leptoseris scabra	IP	127	no	plate
	Leptoseris solida	IP	70	no	other
	Leptoseris striata	IP	103	no	plate
	Leptoseris tubulifera	IP	70	no	plate
	Leptoseris yabei	IP	74	no	plate
	Lithophyllon lobata	IP	20	no	plate
	Lithophyllon mokai	IP	27	no	other
	Lithophyllon ranjithi	IP	20	no	plate
	Lithophyllon undulatum	IP	20	no	plate
	Lobophyllia corymbosa	IP	40	no	massive
	Lobophyllia dentatus	IP	10	no	other
	Lobophyllia diminuta	IP	10	no	other
	Lobophyllia flabelliformis	IP	30	no	massive
	Lobophyllia hattai	IP	40	no	other
	Lobophyllia hemprichii	IP	50	no	massive
	Lobophyllia pachysepta	IP	30	no	massive
	Lobophyllia robusta	IP	40	yes	massive
	Lobophyllia serrata	IP	15	no	massive
	Madracis asanoi	IP	183	no	branching
	Madracis auretenra	C	60	no	branching
	Madracis carmabi	C	40	no	branching
	Madracis decactis	C, SA	125	yes	massive
	Madracis formosa	C	40	no	massive
	Madracis kirbyi	IP	60	yes	massive
	Madracis mirabilis	C	60	no	branching
	Madracis pharensis	C	99	no	massive
	Madracis senaria	C	30	no	other
	Manicina areolata	C	65	no	massive
	Meandrina brasiliensis	C, SA	100	yes	other
	Meandrina danae	C	80	no	other
	Meandrina jacksoni	C	-	-	massive
	Meandrina meandrites	C	80	no	other
	Merulina ampliata	IP	50	no	plate
	Merulina scabricula	IP	40	no	plate
	Merulina scheeri	IP	35	no	plate
	Micromussa amakusensis	IP	30	no	other
	Micromussa diminuta	IP	15	no	massive
	Micromussa minuta	IP	30	no	massive
	Millepora alcicornis	C, SA	50	no	branching
	Millepora braziliensis	SA	30	no	branching
	Millepora complanata	C	-	-	plate
	Millepora dichotoma	IP	-	-	branching
	Millepora exaesa	IP	-	-	massive
	Millepora intricata	IP	-	-	branching
	Millepora laboreli	SA	32	no	massive
	Millepora latifolia	IP	-	-	branching
	Millepora nitida	SA	8.5	no	branching
	Millepora platyphylla	IP	-	-	plate
	Millepora squarrosa	C	-	-	plate
	Millepora striata	IP	-	-	plate
	Millepora tenera	IP	-	-	branching
	Montastraea cavernosa	C, SA	180	yes	massive
	Montigyra kenti	IP	-	yes	massive
	Montipora aequituberculata	IP	43	no	plate
	Montipora altasepta	IP	10	no	branching
	Montipora angulata	IP	20	no	branching
	Montipora aspergillus	IP	10	no	branching
	Montipora australiensis	IP	30	no	massive
	Montipora bilaminata	IP	-	-	plate
	Montipora cactus	IP	20	yes	branching
	Montipora calcarea	IP	20	no	branching
	Montipora caliculata	IP	20	yes	massive
	Montipora capitata	IP	70	yes	branching
	Montipora capricornis	IP	20	no	plate
	Montipora carinata	IP	-	-	branching
	Montipora cebuensis	IP	20	no	plate
	Montipora circumvallata	IP	20	no	branching
	Montipora cocosensis	IP	15	no	massive
	Montipora confusa	IP	30	no	branching
	Montipora corbettensis	IP	20	no	branching
	Montipora crassituberculata	IP	20	no	plate
	Montipora cryptus	IP	20	no	other
	Montipora danae	IP	50	no	plate
	Montipora delicatula	IP	15	no	plate
	Montipora digitata	IP	5	no	branching
	Montipora dilatata	IP	10	no	branching
	Montipora echinata	IP	10	no	branching
	Montipora efflorescens	IP	20	no	massive
	Montipora effusa	IP	20	yes	massive
	Montipora flabellata	IP	10	no	plate
	Montipora florida	IP	20	yes	plate
	Montipora floweri	IP	35	no	massive
	Montipora foliosa	IP	47	no	plate
	Montipora foveolata	IP	25	yes	massive
	Montipora friabilis	IP	20	yes	plate
	Montipora gaimardi	IP	15	no	branching
	Montipora grisea	IP	20	no	massive
	Montipora hemispherica	IP	20	no	branching
	Montipora hirsuta	IP	15	no	branching
	Montipora hispida	IP	40	yes	branching
	Montipora hodgsoni	IP	20	no	plate
	Montipora hoffmeisteri	IP	40	yes	other
	Montipora incrassata	IP	30	no	other
	Montipora informis	IP	20	no	massive
	Montipora kellyi	IP	15	no	branching
	Montipora lobulata	IP	20	no	massive
	Montipora mactanensis	IP	20	no	plate
	Montipora malampaya	IP	15	no	branching
	Montipora meandrina	IP	50	no	other
	Montipora millepora	IP	55	no	plate
	Montipora mollis	IP	40	yes	plate
	Montipora monasteriata	IP	40	no	plate
	Montipora myriophthalma	IP	-	-	other
	Montipora niugini	IP	25	no	branching
	Montipora nodosa	IP	30	no	massive
	Montipora orientalis	IP	20	no	plate
	Montipora pachytuberculata	IP	10	no	branching
	Montipora palawanensis	IP	40	no	plate
	Montipora patula	IP	10	no	plate
	Montipora peltiformis	IP	30	no	plate
	Montipora Porites	IP	25	no	branching
	Montipora samarensis	IP	15	no	branching
	Montipora saudii	IP	8	no	branching
	Montipora setosa	IP	20	no	branching
	Montipora spongiosa	IP	20	no	branching
	Montipora spongodes	IP	25	no	plate
	Montipora spumosa	IP	30	yes	branching
	Montipora stellata	IP	20	yes	branching
	Montipora stilosa	IP	50	no	massive
	Montipora taiwanensis	IP	2	no	massive
	Montipora tortuosa	IP	-	-	branching
	Montipora tuberculosa	IP	40	yes	massive
	Montipora turgescens	IP	30	yes	massive
	Montipora turtlensis	IP	20	yes	branching
	Montipora undata	IP	30	no	plate
	Montipora venosa	IP	30	yes	massive
	Montipora verrilli	IP	40	no	plate
	Montipora verrucosa	IP	45	no	plate
	Montipora verruculosus	IP	20	no	plate
	Montipora vietnamensis	IP	15	no	branching
	Moseleya latistella	IP	10	yes	massive
	Mussa angulosa	C	59	no	other
	Mussismilia braziliensis	SA	60	yes	massive
	Mussismilia harttii	SA	55	no	other
	Mussismilia hispida	SA	92	yes	massive
	Mussismilia leptophylla	SA	10	no	massive
	Mycedium elephantotus	IP	70	no	plate
	Mycedium mancaoi	IP	-	no	plate
	Mycedium robokaki	IP	-	no	plate
	Mycedium spina	IP	-	-	plate
	Mycedium steeni	IP	30	yes	plate
	Mycedium umbra	IP	30	no	other
	Mycetophyllia aliciae	C	85	no	plate
	Mycetophyllia danaana	C	30	no	plate
	Mycetophyllia ferox	C	30	no	plate
	Mycetophyllia lamarckiana	C	75	no	plate
	Mycetophyllia reesi	C	76	no	plate
	Nemenzophyllia turbida	IP	30	yes	other
	Oculina diffusa	C	30	no	branching
	Oculina robusta	C	10	no	branching
	Oculina tenella	C	75	no	branching
	Oculina valenciennesi	C	30	no	branching
	Oculina varicosa	C	152	no	branching
	Orbicella annularis	C	82	no	massive
	Orbicella faveolata	C	40	no	massive
	Orbicella franksi	C	50	no	massive
	Oulastrea crispata	IP	10	yes	other
	Oulophyllia bennettae	IP	30	no	massive
	Oulophyllia crispa	IP	40	no	massive
	Oulophyllia levis	IP	30	no	massive
	Oxypora convoluta	IP	30	no	plate
	Oxypora crassispinosa	IP	30	no	plate
	Oxypora egyptensis	IP	60	no	massive
	Oxypora glabra	IP	40	no	plate
	Oxypora lacera	IP	30	no	plate
	Pachyseris foliosa	IP	25	no	plate
	Pachyseris gemmae	IP	25	no	plate
	Pachyseris inattesa	IP	-	-	plate
	Pachyseris involuta	IP	15	no	plate
	Pachyseris rugosa	IP	20	yes	plate
	Pachyseris speciosa	IP	88	no	plate
	Palauastrea ramosa	IP	30	yes	branching
	Paraclavarina triangularis	IP	20	no	branching
	Paramontastraea salebrosa	IP	20	no	massive
	Paramontastraea serageldini	IP	25	no	massive
	Parascolymia australis	IP	40	no	other
	Parascolymia vitiensis	IP	50	no	other
	Parasimplastrea omanensis	IP	20	yes	other
	Pavona bipartita	IP	20	no	massive
	Pavona cactus	IP	35	yes	plate
	Pavona chiriquiensis	IP	30	no	other
	Pavona clavus	IP	40	no	massive
	Pavona danai	IP	15	no	branching
	Pavona decussata	IP	20	yes	plate
	Pavona diffluens	IP	20	no	massive
	Pavona divaricata	IP	2	-	branching
	Pavona duerdeni	IP	15	no	massive
	Pavona explanulata	IP	25	yes	plate
	Pavona frondifera	IP	15	no	plate
	Pavona gigantea	IP	30	no	massive
	Pavona maldivensis	IP	67	no	massive
	Pavona minuta	IP	55	no	massive
	Pavona varians	IP	80	yes	other
	Pavona venosa	IP	20	no	massive
	Pectinia africanus	IP	30	no	massive
	Pectinia alcicornis	IP	25	yes	branching
	Pectinia ayleni	IP	25	no	plate
	Pectinia elongata	IP	25	yes	branching
	Pectinia lactuca	IP	20	yes	plate
	Pectinia maxima	IP	25	yes	plate
	Pectinia paonia	IP	25	yes	plate
	Pectinia pygmaeus	IP	30	yes	branching
	Pectinia teres	IP	30	yes	branching
	Phymastrea multipunctata	IP	15	yes	other
	Physogyra lichtensteini	IP	20	yes	massive
	Platygyra acuta	IP	20	no	massive
	Platygyra carnosus	IP	15	no	massive
	Platygyra contorta	IP	20	yes	massive
	Platygyra crosslandi	IP	20	no	massive
	Platygyra daedalea	IP	40	no	massive
	Platygyra lamellina	IP	30	no	massive
	Platygyra pini	IP	30	no	massive
	Platygyra ryukyuensis	IP	30	no	massive
	Platygyra sinensis	IP	30	no	massive
	Platygyra verweyi	IP	20	no	massive
	Platygyra yaeyamaensis	IP	20	no	massive
	Plerogyra cauliformis	IP	-	no	other
	Plerogyra discus	IP	15	no	other
	Plerogyra simplex	IP	30	yes	branching
	Plerogyra sinuosa	IP	40	no	other
	Plesiastrea versipora	IP	40	no	massive
	Pocillopora acuta	IP	-	-	branching
	Pocillopora aliciae	IP	-	-	branching
	Pocillopora ankeli	IP	10	no	branching
	Pocillopora bairdi	IP	-	-	branching
	Pocillopora brevicornis	IP	-	no	branching
	Pocillopora capitata	IP	20	no	branching
	Pocillopora damicornis	IP	55	yes	branching
	Pocillopora danae	IP	15	no	branching
	Pocillopora effusus	IP	-	no	branching
	Pocillopora elegans	IP	30	no	branching
	Pocillopora eydouxi	IP	20	no	branching
	Pocillopora fungiformis	IP	15	no	branching
	Pocillopora indiania	IP	20	no	branching
	Pocillopora inflata	IP	10	no	branching
	Pocillopora kelleheri	IP	40	no	branching
	Pocillopora ligulata	IP	-	no	branching
	Pocillopora Meandrina	IP	27	no	branching
	Pocillopora molokensis	IP	55	no	branching
	Pocillopora solida	IP	50	-	branching
	Pocillopora verrucosa	IP	54	no	branching
	Pocillopora woodjonesi	IP	26	no	branching
	Pocillopora zelli	IP	15	no	branching
	Podabacia crustacea	IP	50	no	plate
	Podabacia kunzmanni	IP	-	-	plate
	Podabacia lankaensis	IP	-	yes	other
	Podabacia motuporensis	IP	20	no	plate
	Podabacia sinai	IP	20	no	plate
	Polycyathus chaishanensis	IP	-	-	other
	Polyphyllia novaehiberniae	IP	15	no	other
	Polyphyllia talpina	IP	30	no	other
	Porites annae	IP	30	yes	branching
	Porites aranetai	IP	20	no	branching
	Porites arnaudi	IP	37	no	plate
	Porites astreoides	C, SA	70	no	massive
	Porites attenuata	IP	20	no	branching
	Porites australiensis	IP	50	no	massive
	Porites bernardi	IP	-	no	branching
	Porites branneri	C, SA	60	no	massive
	Porites brighami	IP	-	no	massive
	Porites cocosensis	IP	-	no	branching
	Porites colonensis	C	25	no	plate
	Porites compressa	IP	30	no	branching
	Porites coumnaris	IP	15	no	massive
	Porites cumulatus	IP	20	no	branching
	Porites cylindrica	IP	20	no	branching
	Porites decasepta	IP	7	-	other
	Porites deformis	IP	30	no	branching
	Porites densa	IP	20	no	massive
	Porites desilveri	IP	-	no	branching
	Porites divaricata	C	47	yes	branching
	Porites duerdeni	IP	-	no	branching
	Porites echinulata	IP	50	no	massive
	Porites ericacea	IP	-	no	branching
	Porites eridani	IP	20	no	branching
	Porites evermanni	IP	30	no	massive
	Porites excavata	IP	-	no	branching
	Porites flavus	IP	20	no	branching
	Porites fontanesii	IP	-	-	branching
	Porites furcata	C	50	no	branching
	Porites harrisoni	IP	15	no	massive
	Porites hawaiiensis	IP	-	-	other
	Porites heronensis	IP	20	yes	massive
	Porites horizontalata	IP	20	no	branching
	Porites iwayamaensis	IP	2	-	branching
	Porites latistellata	IP	20	no	branching
	Porites lichen	IP	40	no	plate
	Porites lobata	IP	67	no	massive
	Porites lutea	IP	70	no	massive
	Porites mayeri	IP	20	no	massive
	Porites monticulosa	IP	20	no	other
	Porites murrayensis	IP	5	no	massive
	Porites myrmidonensis	IP	55	no	massive
	Porites napopora	IP	15	no	branching
	Porites negrosensis	IP	15	no	branching
	Porites nigrescens	IP	20	no	branching
	Porites nodifera	IP	15	no	massive
	Porites okinawensis	IP	-	yes	massive
	Porites ornata	IP	15	no	branching
	Porites panamensis	IP	36	no	massive
	Porites porites	C	35	no	branching
	Porites profundus	IP	15	no	branching
	Porites pukoensis	IP	-	no	massive
	Porites randalli	IP	-	-	massive
	Porites rugosa	IP	15	no	branching
	Porites rus	IP	20	no	branching
	Porites sillimaniani	IP	5	no	branching
	Porites solida	IP	20	no	massive
	Porites somaliensis	IP	20	no	massive
	Porites stephensoni	IP	5	no	massive
	Porites studeri	IP	40	yes	massive
	Porites sverdrupi	IP	40	-	branching
	Porites tuberculosa	IP	20	no	branching
	Porites vaughani	IP	40	no	other
	Poritipora paliformis	IP	-	no	massive
	Psammocora albopicta	IP	28	yes	massive
	Psammocora contigua	IP	35	yes	plate
	Psammocora digitata	IP	20	yes	massive
	Psammocora explanulata	IP	35	no	other
	Psammocora haimiana	IP	50	no	massive
	Psammocora interstinctus	IP	-	no	massive
	Psammocora profundacella	IP	50	no	massive
	Psammocora stellata	IP	70	no	branching
	Psammocora verrilli	IP	40	no	massive
	Pseudosiderastrea formosa	IP	-	-	other
	Pseudosiderastrea tayamai	IP	20	no	massive
	Sandalolitha robusta	IP	21	yes	other
	Scapophyllia cylindrica	IP	25	yes	massive
	Sclerophyllia margariticola	IP	-	-	other
	Sclerophyllia maxima	IP	15	yes	other
	Scolymia lacera	C	80	no	other
	Scolymia wellsi	C, SA	100	yes	other
	Seriatopora aculeata	IP	40	no	branching
	Seriatopora caliendrum	IP	40	no	branching
	Seriatopora dentritica	IP	40	no	branching
	Seriatopora guttata	IP	40	no	branching
	Seriatopora hystrix	IP	55	no	branching
	Seriatopora stellata	IP	20	no	branching
	Siderastrea radians	C, SA	33	yes	massive
	Siderastrea savignyana	IP	10	yes	massive
	Siderastrea siderea	C, SA	70	yes	massive
	Siderastrea stellata	C, SA	90	yes	massive
	Simplastrea vesicularis	IP	-	no	other
	Solenastrea bournoni	C	30	yes	massive
	Solenastrea hyades	C	40	yes	massive
	Stephanocoenia michelinii	C, SA	100	yes	massive
	Stylaraea punctata	IP	-	no	other
	Stylocoeniella armata	IP	50	no	other
	Stylocoeniella cocosensis	IP	10	no	other
	Stylocoeniella guentheri	IP	62	no	branching
	Stylophora danae	IP	40	no	branching
	Stylophora kuehlmanni	IP	70	no	branching
	Stylophora madagascariensis	IP	20	no	branching
	Stylophora mamillata	IP	40	no	branching
	Stylophora mordax	IP	40	-	branching
	Stylophora pistillata	IP	65	no	branching
	Stylophora subseriata	IP	30	no	branching
	Stylophora wellsi	IP	10	no	branching
	Symphyllia Agaricia	IP	40	no	massive
	Symphyllia erythraea	IP	45	no	massive
	Symphyllia hassi	IP	20	no	massive
	Symphyllia radians	IP	40	no	massive
	Symphyllia recta	IP	40	no	massive
	Symphyllia valenciennesi	IP	40	no	plate
	Symphyllia wilsoni	IP	15	no	massive
	Trachyphyllia geoffroyi	IP	40	yes	other
	Turbinaria bifrons	IP	25	no	plate
	Turbinaria conspicua	IP	20	no	plate
	Turbinaria frondens	IP	25	yes	plate
	Turbinaria heronensis	IP	15	no	branching
	Turbinaria irregularis	IP	40	no	plate
	Turbinaria mesenterina	IP	20	yes	plate
	Turbinaria patula	IP	20	yes	plate
	Turbinaria peltata	IP	40	yes	plate
	Turbinaria radicalis	IP	25	no	other
	Turbinaria reniformis	IP	60	yes	plate
	Turbinaria stellulata	IP	15	no	massive
	Zoopilus echinatus	IP	20	no	other
